# Supplementary material
Source: MDPI journal article supplement (https://www.mdpi.com/2073-4441/12/8/2090)
Supplement: s1 [file s1]

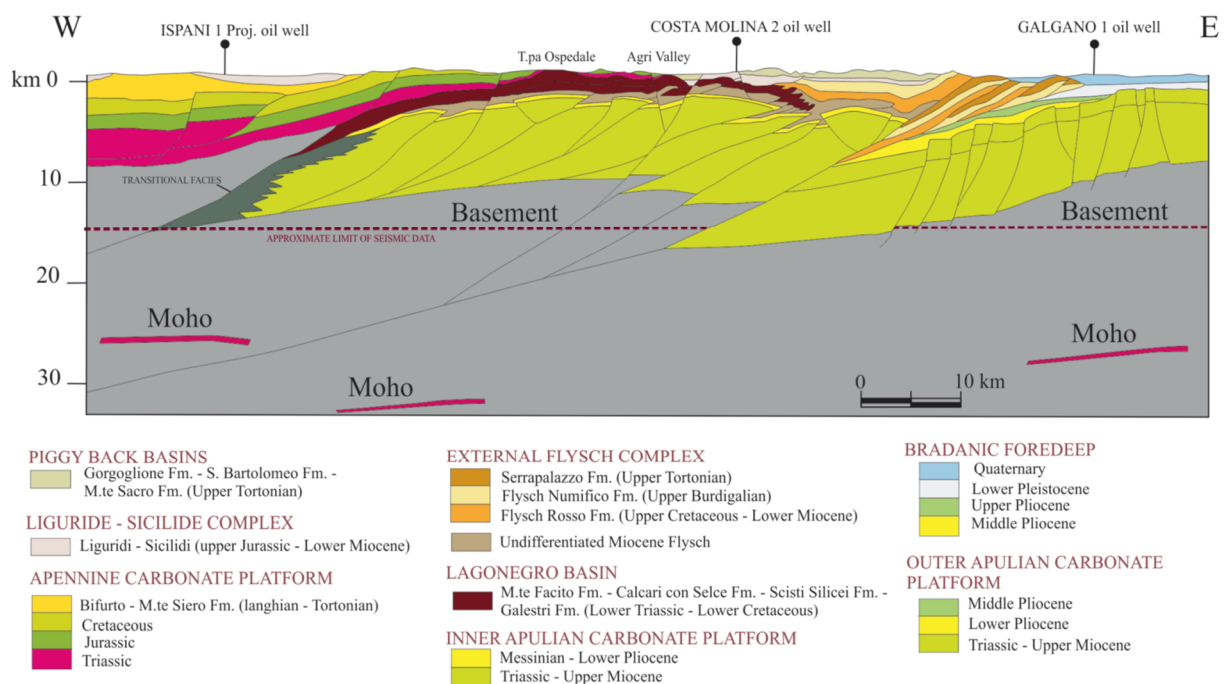

**Figure S1.** Geological section W-E crossing the Agri Valley from Menardi Noguera and Rea [24], modified. In the legend, units of the same geological age but belonging to different platforms are indicated with the same color.

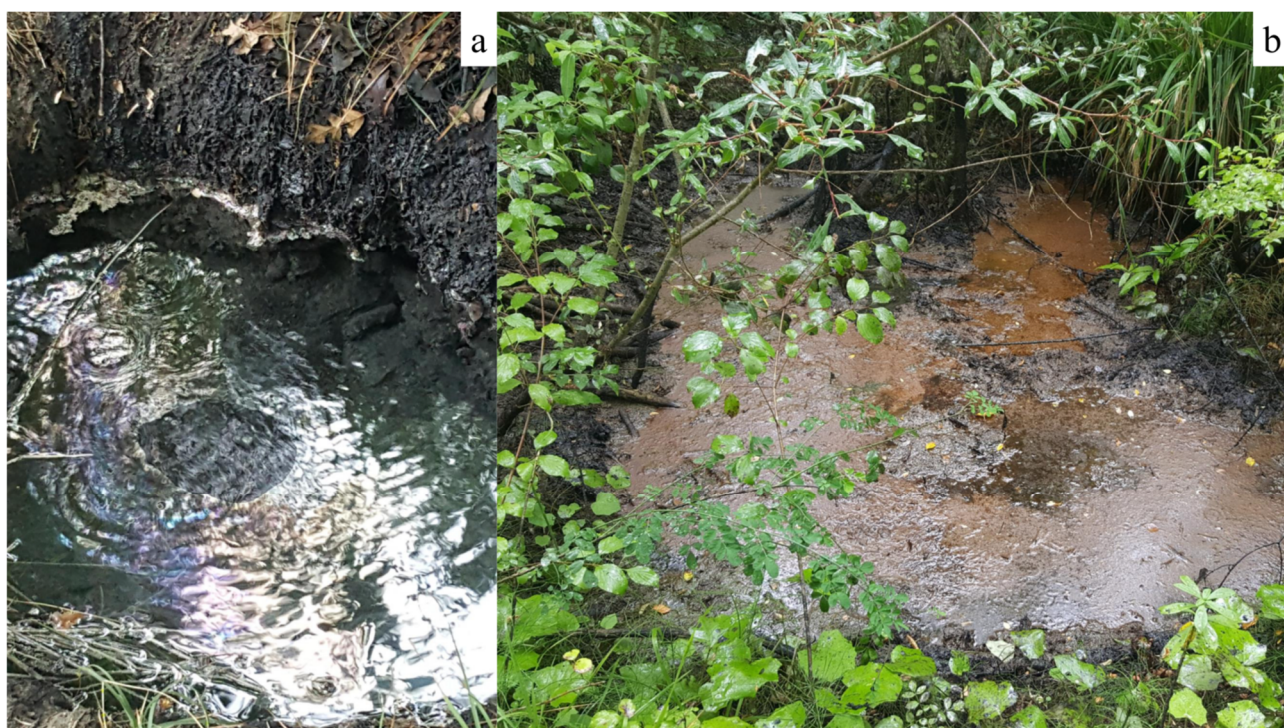

**Figure S2.** Hydrocarbon springs S1 (a) and S2 (b).

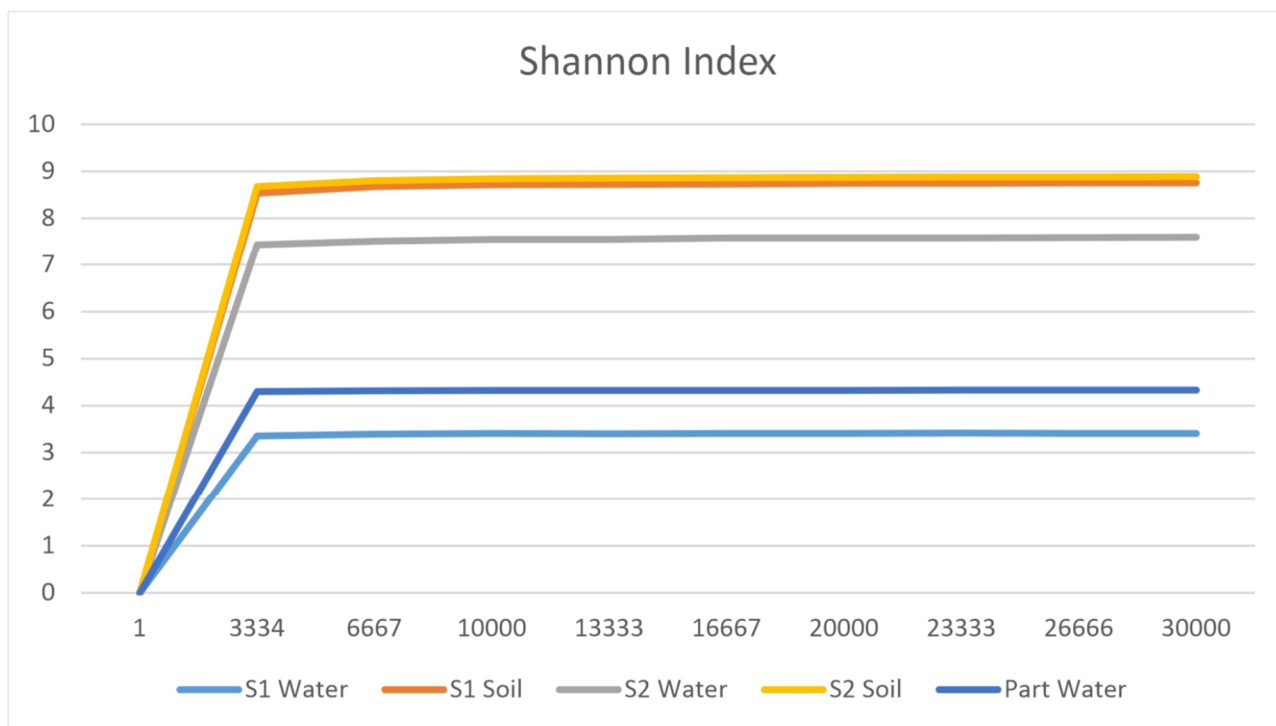

**Figure S3.** Rarefaction curves of spring water, groundwater, and soil samples collected at the study site. The alpha-diversity plots were obtained by using the Shannon index.
